# Supplementary material for: Genetic Diversity of Norovirus in Children with Acute Gastroenteritis in Southwest Nigeria, 2015–2017
Source: MDPI journal article supplement (doi:10.3390/v15030644), 2023-02-28
Supplement: s1 [file s1]

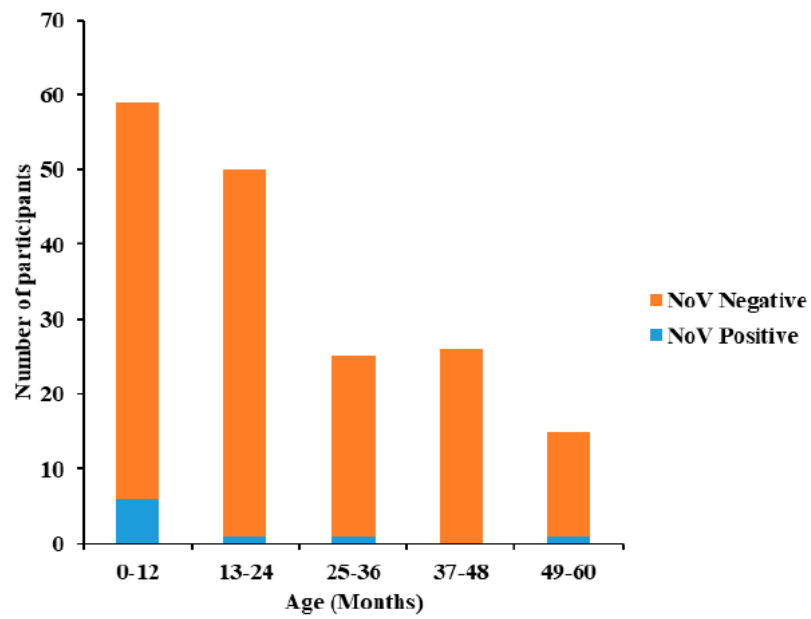

**Figure S1.** Age distribution of NoV infection in children with acute gastroenteritis in Ogun State, Nigeria, from February 2015 to April 2017.
